# Supplementary material for: The nucleoprotein of influenza A virus induces p53 signaling and apoptosis via attenuation of host ubiquitin ligase RNF43
Source: PubMed Central journal article supplement (PMC4669709; doi:10.1038/cddis.2015.131), 2015-05-21
Supplement: cddis2015131x1.pdf [file cddis2015131x1.pdf]

## Supplementary Figure S1.

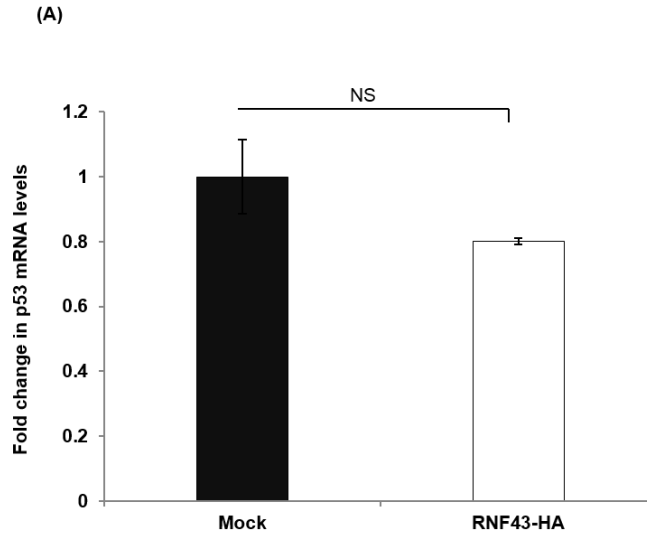

**Fig. S1. RNF43 does not alter p53 transcripts levels.** A549 cells were transfected with plasmids pCDNA3.1 (Mock) or pCDNA3.1-RNF43-Flag-HA (RNF43-HA). Cells were harvested after 48h post transfection and processed for mRNA quantification by qRT PCR analysis. Result is shown as mean  $\pm$  SD of three independent experiments. NS indicates non-significant statistical difference.
